# Supplementary material
Source: PubMed Central journal article supplement (PMC8200362)
Supplement: NIHMS1675333-supplement-S2.pdf [file NIHMS1675333-supplement-S2.pdf]

# Sensitivity analysis on the association between income and Coronary Heart Disease

Income vs combination of education and income

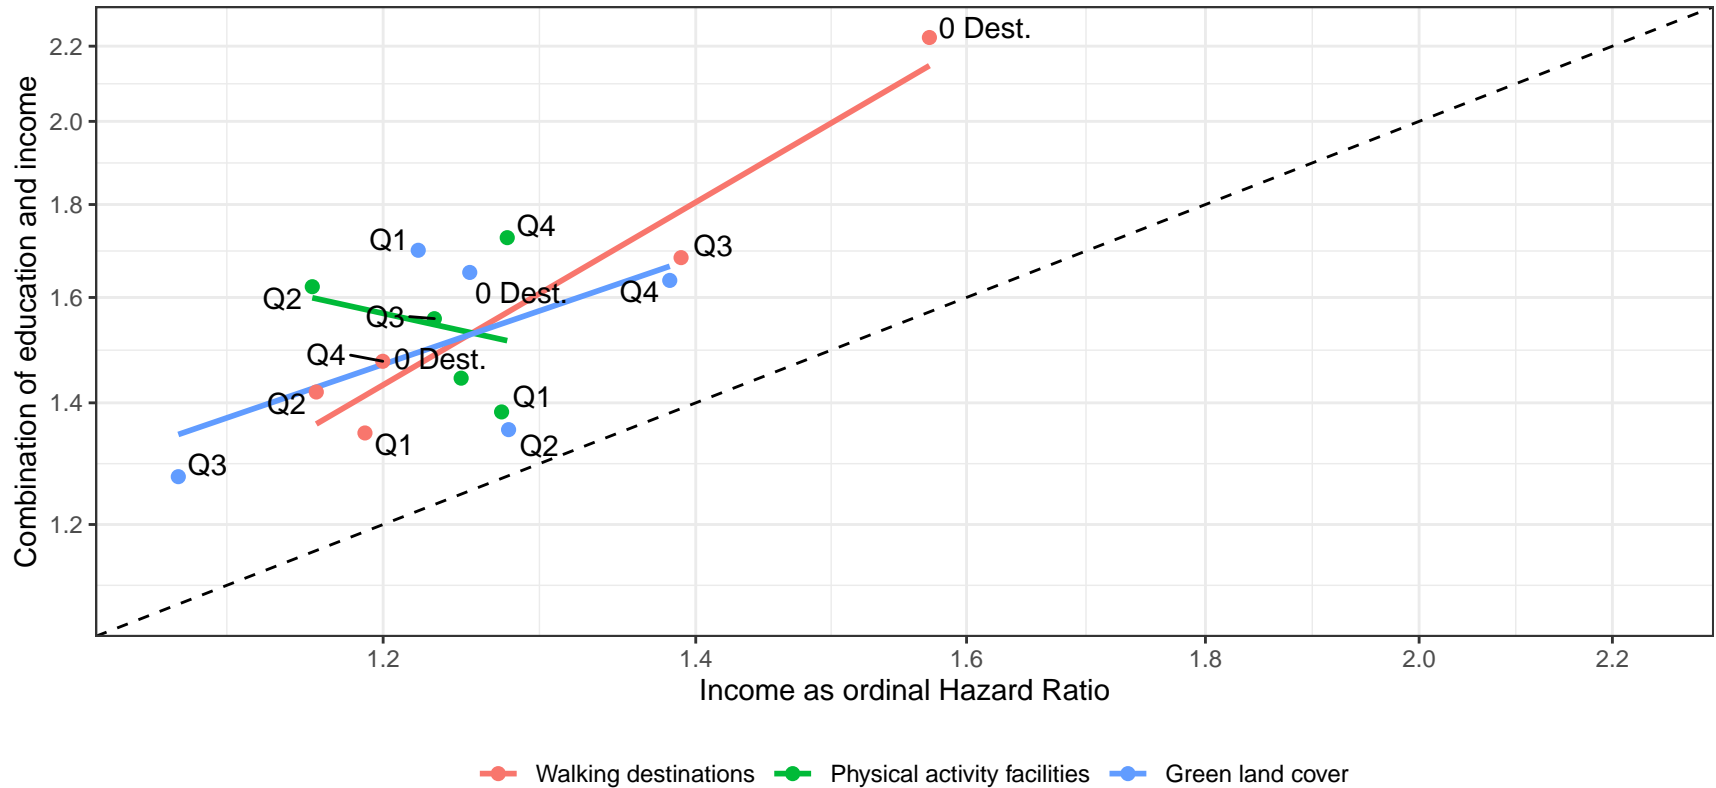

Each dot represents one group of physical activity environment (0 and Quartiles)
