# Supplementary material
Source: PubMed Central journal article supplement (PMC8200362)
Supplement: NIHMS1675333-supplement-S4.pdf [file NIHMS1675333-supplement-S4.pdf]

# Sensitivity analysis on the association between income and Coronary Heart Disease

Complete cases vs multiple imputation

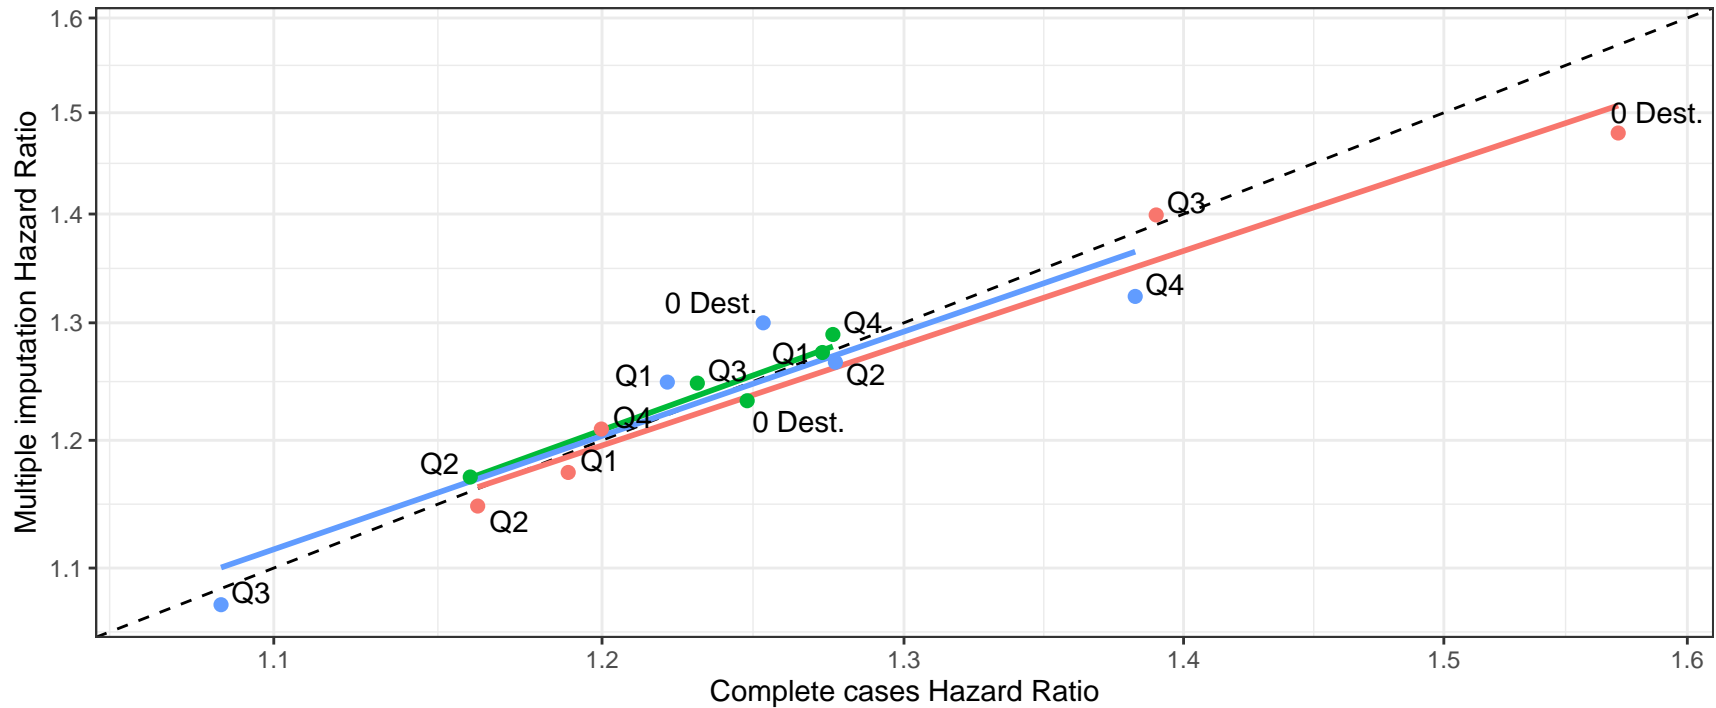

Walking destinations Physical activity facilities Green land cover

Each dot represents one group of physical activity environment (0 and Quartiles)
